# Supplementary material for: Histone H3K23-specific acetylation by MORF is coupled to H3K14 acylation
Source: PubMed Central journal article supplement (PMC6797804; doi:10.1038/s41467-019-12551-5), 2019-10-17
Supplement: 41467_2019_12551_MOESM2_ESM.pdf [file 41467_2019_12551_MOESM2_ESM.pdf]

## **Supplementary Information**

### **Histone H3K23-specific acetylation by MORF is coupled to H3K14 acylation**

Brianna J. Klein, Suk Min Jang, et al.,

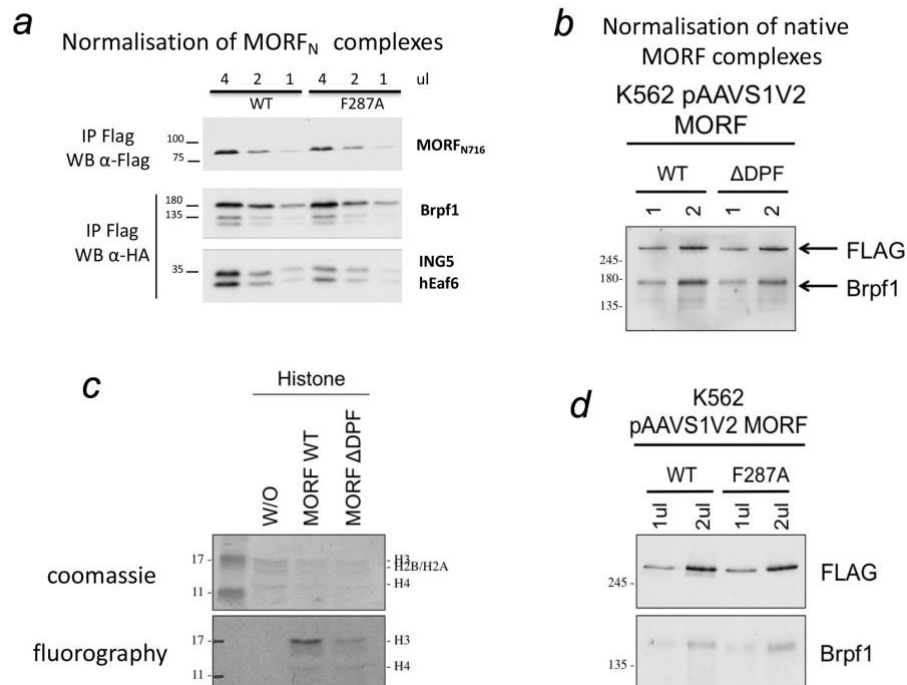

**Supplementary Figure 1. MORF complexes used in HAT assays.** (a) MORF complexes purified from HEK293T cells after transient co-transfection of Flag-MORF with HA-BRPF1, HA-ING5 and HA-hEaf6. Western blot analysis of flag peptide elution of the 4 subunits and their normalization for HAT assays. (b) Normalization of wild-type and delta-DPF native MORF complexes purified from K562 cells, as evaluated by western blot using Flag and Brpf1 Abs. (c) In-gel HAT assays corresponding to the liquid HAT assay with native wild-type and DPF-deleted MORF complexes on free core histones. The deletion of MORF DPF greatly affects its activity toward free histone H3. (d) Normalization of wild-type and F287A native MORF complexes purified from K562 cells, as evaluated by western blot using FLAG and BRPF1 antibodies. Related to Figures 1 and 4.

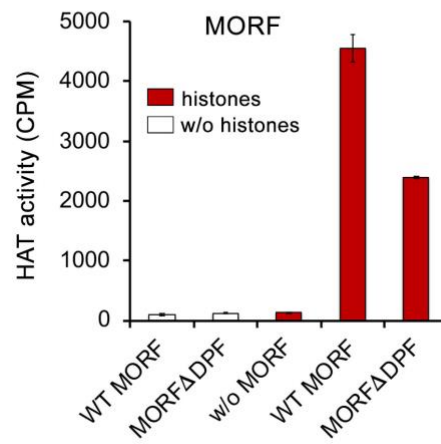

**Supplementary Figure 2. The MORF complex is a H3K23-specific HAT.** HAT activity of the native MORF WT and MORF  $\Delta$ DPF complexes from K562 cells on native free core histones. Error bars indicate the range from duplicate samples. Related to Figure 1.

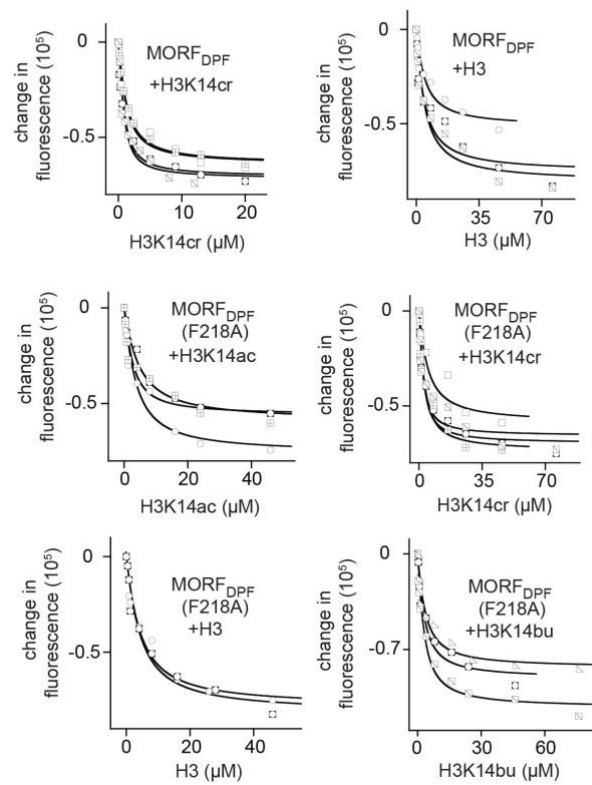

**Supplementary Figure 3. Measurements of binding affinities by fluorescence spectroscopy.** Binding curves used to determine the  $K_d$  values by tryptophan fluorescence for the interactions of WT and mutated MORF<sub>DPF</sub> to indicated H3 peptides. Related to Figure 2.

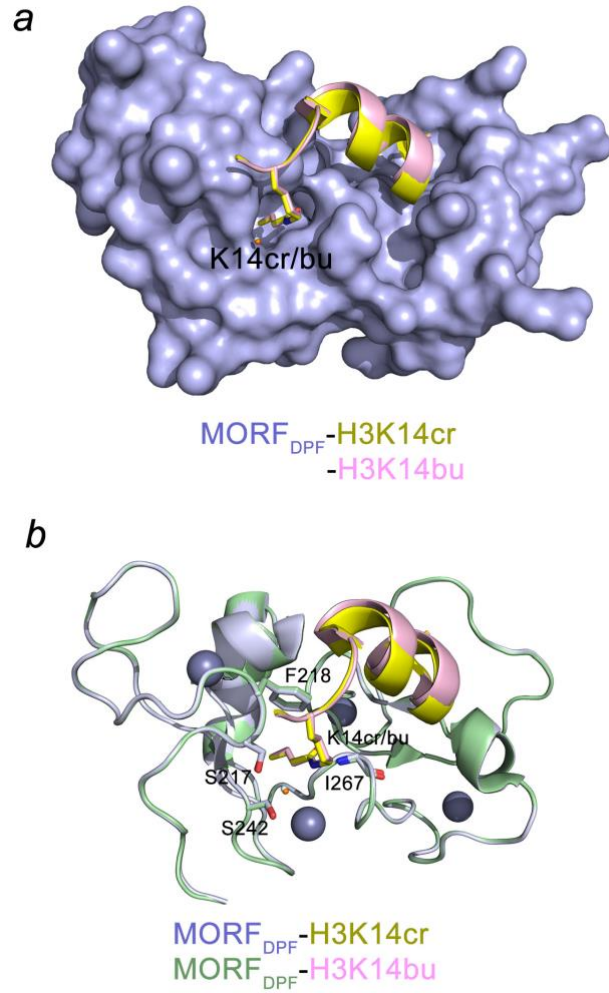

**Supplementary Figure 4. The acyllysine-binding mechanism.** Structural overlay of MORF<sub>DPF</sub> in complex with H3K14cr peptide (dark yellow) and H3K14bu peptide (pink) using surface representation (a) or ribbon diagram (b). Related to Figure 3.

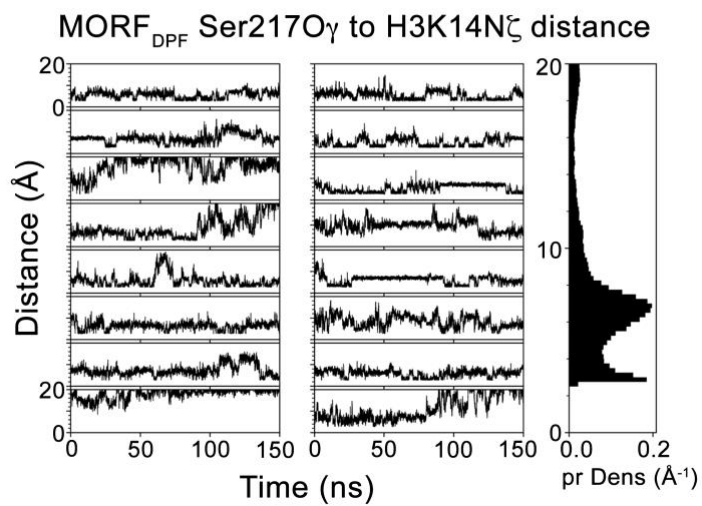

**Supplementary Figure 5. MD simulations of the MORF<sub>DPF</sub>-H3 complex.** Time-course and distribution of the distance between Ser217O $\gamma$  of MORF<sub>DPF</sub> and K14N $\zeta$  of H3 in MD. Related to Figure 3.

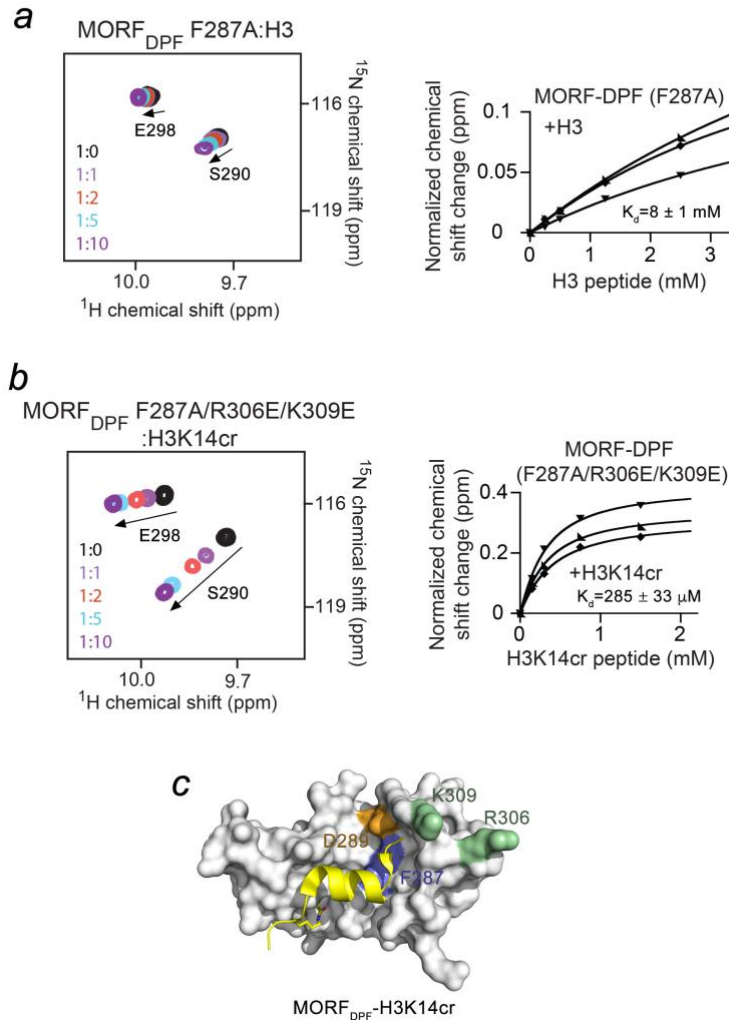

**Supplementary Figure 6. The closely positioned histone and DNA binding sites of MORF<sub>DPF</sub>** (a, b) Superimposed <sup>1</sup>H,<sup>15</sup>N HSQC spectra of MORF<sub>DPF</sub> mutants collected as indicated peptides were added stepwise (left panels). Spectra are color coded according to the protein:peptide molar ratio (inset). Representative binding curves used to determine  $K_D$ s for the interactions of MORF<sub>DPF</sub> mutants with indicated peptides by NMR (right panels). Error bars represent SD. (c) Structure of the MORF<sub>DPF</sub>-H3K14cr complex with mutated residues colored and labeled. Related to Figures 4 and 5.

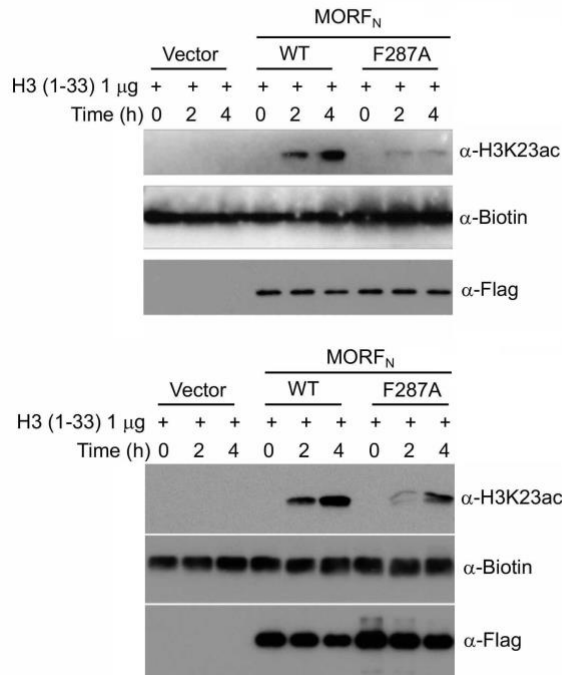

**Supplementary Figure 7. Two biological repeats show that point mutation of DPF attenuates HAT activity of MORF *in vitro*.** Western blot analysis of HAT assays of purified wild type and mutant MORF<sub>N</sub> using H3 (1-33) peptide as substrate. Biotinylated peptides are shown as loading controls. Related to Figure 4.



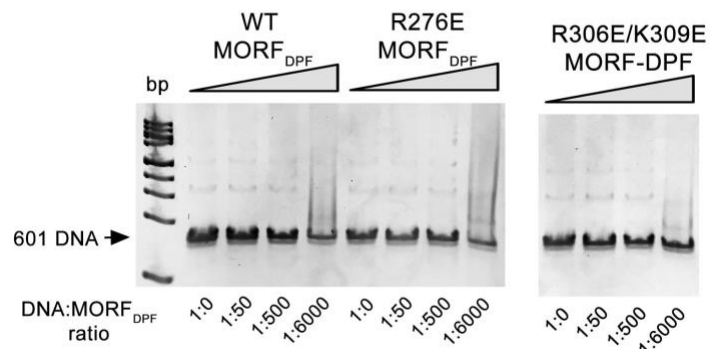

**Supplementary Figure 8. The region of MORF<sub>DPF</sub> containing R306 and K309 is involved in the interaction with DNA.** EMSA of 147-bp 601 DNA incubated with increasing amounts of WT or mutated MORF<sub>DPF</sub>. DNA to protein molar ratio is shown below the gel images. Related to Figure 5.

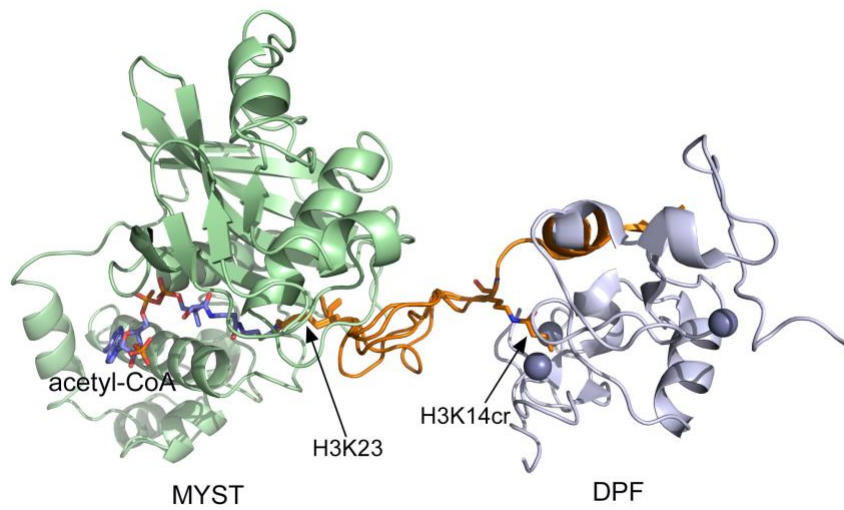

**Supplementary Figure 9. The bivalent interaction of the MYST and DPF domains with histone H3 tail.** A model showing the interaction of MORF<sub>DPF-MYST</sub> with a single H3 tail *in cis*. Related to Figure 8.

Fig. 5b

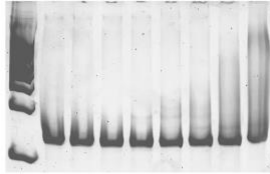

Fig. 5c

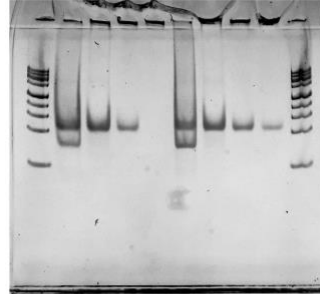

Fig. 5d

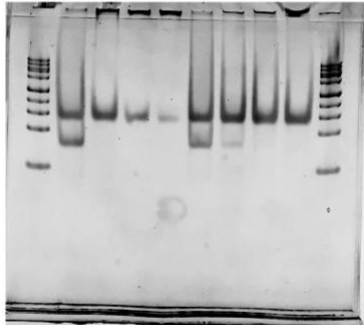

Fig. 5e

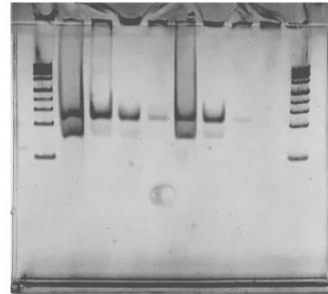

Suppl. Fig. 8

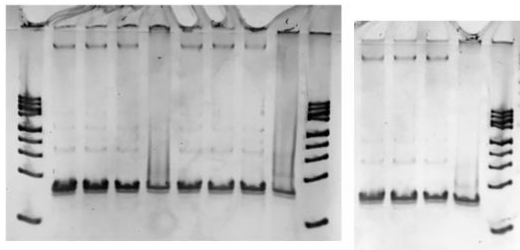

**Supplementary Figure 10. Uncropped gels.** Related to Figure 5b-e and Supplementary Figure 8.

**Supplementary Table 1. Data collection and refinement statistics for the structure of the MORF<sub>DPF</sub>-H3K14cr complex (molecular replacement)**

|                                                      | MORF-DPF:H3K14cr  |
|------------------------------------------------------|-------------------|
| <b>Data collection</b>                               |                   |
| Space group                                          | P 1 21 1          |
| Cell dimensions                                      |                   |
| <i>a, b, c</i> (Å)                                   | 32.6, 69.5, 70.2  |
| $\alpha, \beta, \gamma$ (°)                          | 90.0, 97.3, 90.0  |
| Resolution (Å)                                       | 2.08(2.12-2.08) * |
| <i>R</i> <sub>sym</sub> or <i>R</i> <sub>merge</sub> | 9.0(26.4)         |
| <i>I</i> / $\sigma I$                                | 20.3(6.6)         |
| Completeness (%)                                     | 99.9(100.0)       |
| Redundancy                                           | 6.3(5.9)          |
| <b>Refinement</b>                                    |                   |
| Resolution (Å)                                       | 24.6-2.08         |
| No. reflections                                      | 18589             |
| <i>R</i> <sub>work</sub> / <i>R</i> <sub>free</sub>  | 0.1659/0.2191     |
| No. atoms                                            | 2192              |
| Protein                                              | 1936              |
| Ligand/ion                                           | 36                |
| Water                                                | 220               |
| <i>B</i> -factors                                    | 30.8              |
| Protein                                              | 30.3              |
| Ligand/ion                                           | 32.1              |
| Water                                                | 35.7              |
| R.m.s. deviations                                    |                   |
| Bond lengths (Å)                                     | 0.007             |
| Bond angles (°)                                      | 0.92              |
| Ramachandran plot                                    |                   |
| Most favored (%)                                     | 97.1              |
| Allowed (%)                                          | 2.9               |
| Outliers (%)                                         | 0                 |

\*Values in parentheses are for highest-resolution shell.

**Supplementary Table 2. Primer sequences**

| <b>Primer Name</b>  | <b>Sequence</b>                                      |
|---------------------|------------------------------------------------------|
| F218A Forward       | gatcccattccaatatgtagcgctgttggggactaaagaatc           |
| F218A Reverse       | gattctttagtccccaaacaggcgctacataattggaatgggatc        |
| R276E Forward       | gcaagacatgcagtgctgtgaggtccaaggcagaaatgctga           |
| R276E Reverse       | tcagcatttctgccttggacctcacaggcactgcatgtcttgc          |
| F287A Forward       | caaggcagaaatgctgataatatgcttgcttgattcctgtgatagag      |
| F287A Reverse       | ctctatcacaggaatcacaagcaagcatattatcagcatttctgccttg    |
| D289A Forward       | tgctgataatatgctttttgtgcttctgtgatagaggattcata         |
| D289A Reverse       | tatgaaatcctctatcacaggaagcacaataaagcatattatcagca      |
| R306E/K309E Forward | tgcttgaccaccactttccgagatgccagaggggatgtggattgccaagtc  |
| R306E/K309E Reverse | gacttgcaaatccacatcccctctggcatctcggaagtggtgggtcacagca |
